1 TeamTree analysis: a new approach to evaluate scientific production

2

3 Short title

4 TeamTree analysis

5

6 Frank W. Pfrieger\*

7

8 Centre National de la Recherche Scientifique, Université de Strasbourg, Institut des

9 Neurosciences Cellulaires et Intégratives, Strasbourg, France.

10

11 <https://orcid.org/0000-0001-7085-1431>

12

13 \*Corresponding author

14 Email: [fw-pfrieger@gmx.de](mailto:fw-pfrieger@gmx.de) or [frank.pfrieger@unistra.fr](mailto:frank.pfrieger@unistra.fr) (FWP)

## 15 **Abstract**

16 Advances in science and technology depend on the work of research teams and the publication of  
17 results through peer-reviewed articles representing a growing socio-economic resource. Current  
18 methods to mine the scientific literature regarding a field of interest focus on content, but the  
19 workforce credited by authorship remains largely unexplored, and appropriate measures of  
20 scientific production are debated. Here, a new bibliometric approach named TeamTree analysis  
21 is introduced that visualizes the development and composition of the workforce driving a field. A  
22 new citation-independent measure that scales with the H index estimates impact based on  
23 publication record, genealogical ties and collaborative connections. This author-centered  
24 approach complements existing tools to mine the scientific literature and to evaluate research  
25 across disciplines.

## 27 **Keywords**

28 Altmetrics, authorship, bibliometric, citation, collaborations, data science, genealogy,  
29 infometrics, journal impact, key opinion leader, meta research, science of science, scientometric,  
30 team science, webometrics, Aplysia, chirped laser pulses, circadian clock, cosmic inflation,  
31 CRISPR, ice core, organoids, quantum computer, supramolecular chemistry

## 33 **Introduction**

34 Progress in science and technology depends on research teams working on specific topics of  
35 interest and on the publication of their results in peer-reviewed articles [1]. The rapidly growing  
36 body of scientific information [2] reflects past and current states of the art and represents an

37 invaluable socio-economic resource guiding future research activities, policies and investments  
38 [3-8]. Its utility relies on the quality and accessibility of bibliographic databases [9, 10] and on  
39 refined methods to search and analyse the content of scientific articles [3, 6, 11-16]. Authorship  
40 on these articles credits contributions of individual team members with diverse expertise and  
41 skills [17-21], but choosing the best method to evaluate research, for example to identify  
42 potential experts, recruits and collaborators, remains a challenge [22]. Presently, the impact of  
43 individual contributors [23], journals [24], institutions and nations [25] is predominantly  
44 estimated based on citation counts of scientific articles (for reviews see [5, 26-28]). In a frequent  
45 scenario, a user interested in a specific topic queries a bibliographic database, scrutinizes the  
46 resulting list of relevant publications and learns readily about scientific advances. But, it is very  
47 difficult for the user to learn about the contributing teams and their impact. To address this  
48 recurring issue, I propose a new bibliometric approach, further referred to as TeamTree analysis  
49 (TTA). Using author names and publication years of scientific articles related to a field of  
50 interest, TTA reveals the development and composition of the workforce with new visuals,  
51 named TeamTree graphs (TTGs), and estimates the impact of authors with a new metric named  
52 TeamTree product (TTP). TTP takes into account three aspects of scientific production:  
53 publication of articles, the generation of offspring and the establishment of collaborations. TTP  
54 does not depend on citation counts or journal impact, but scales with the H index [23] and the  
55 sum of citations. Here, the principles of TTA are introduced and its main features are illustrated  
56 using a generic model and publications from selected fields of science and technology.

57

## 58 **Methodology**

59 The principal steps and key features of TTA are introduced in Fig 1 using generic publications.  
60 The TTA-derived parameters are summarized in Table 1. Typically, scientific articles related to a  
61 user-defined topic of interest are retrieved from a bibliographic database (Fig 1A; Table 2). From  
62 each article, TTA extracts the authors, the year of publication and a database-specific article  
63 identifier (Fig 1A). TTA includes author initials to reduce author ambiguity [29]. For some  
64 fields, frequent ambiguous author names were removed. TTA categorizes authors according to  
65 their byline position and sorts publications by year. Then, it assigns a chronologic author index  
66 (AI) and a randomly generated color (C) to each last author (Fig 1B). TTA focuses on authors on  
67 the last byline position as they are mostly responsible for the research [19]. In the following, the  
68 term "author" refers to "last author" unless indicated otherwise.

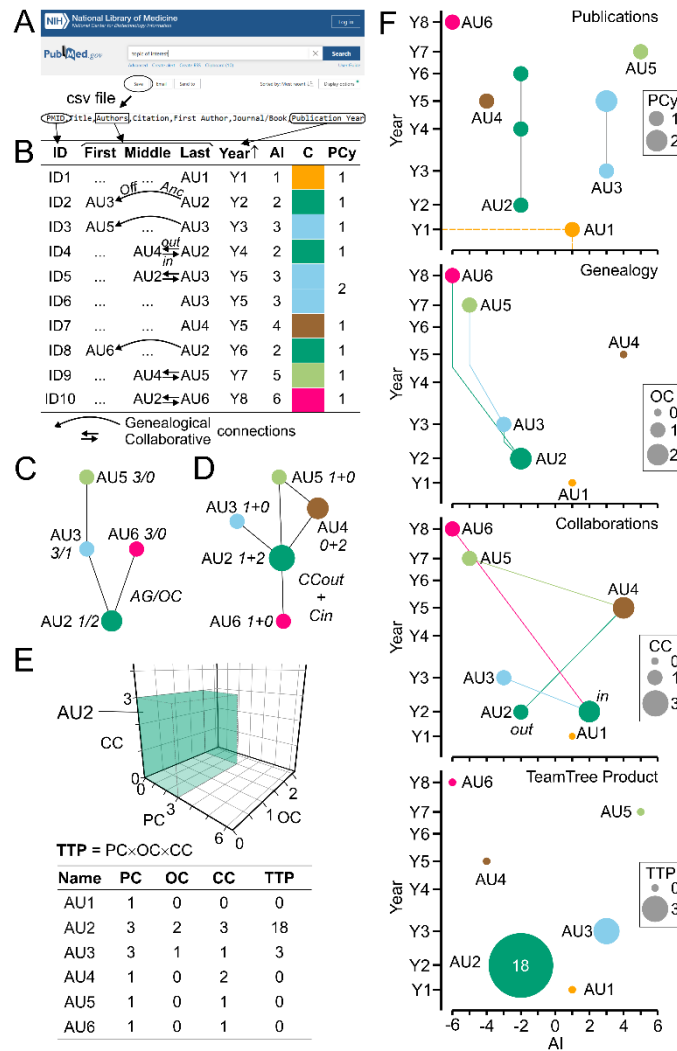

69

70 **Fig 1. Principal steps and key features of TeamTree analysis**

71 (A) Screenshots of the PubMed website and of a comma-separated values (csv) file illustrating a  
 72 query in the bibliographic database MEDLINE, the download of scientific articles and the  
 73 extraction of data required by TTA. (B) Table showing generic articles with identifiers (ID),  
 74 authors separated by byline position, and years of publication. Only authors mentioned at least  
 75 once on the last byline position are taken into account and indicated by generic names (AUx).  
 76 TTA sorts articles by year of publication in ascending order, assigns to each last author a  
 77 chronologic author index (AI) and a unique color (C) and counts the number of articles per  
 78 author per year (PCy). Curved arrows indicate genealogical relations between ancestors and

79 offspring on the last and first byline position, respectively. Straight arrows indicate collaborative  
80 connections between last authors and co-authors (out) and vice-versa (in). (C) Family tree and  
81 (D) collaborative network derived from the generic articles shown in panel B with genealogy-  
82 and collaboration-related parameters indicated for each author. AG, author generation; OC,  
83 offspring count; CC = CCout + CCin, number of collaborative connections. (E) Three-  
84 dimensional plot of key metrics (PC, publication count as last author) for a selected author  
85 (AU2) shown in panel B. The volume occupied by the author within the parameter space is  
86 indicated by the author-specific color and represented numerically by the TeamTree product  
87 (TTP). The table summarizes the TTA-derived parameters of generic authors. (F) TeamTree  
88 graphs (TTGs) of the generic authors shown in panel B indicating from top to bottom their  
89 publication record, genealogic and collaborative connections and TTP values. For publications  
90 and TTP values, signs of AI alternate between odd and even values. For genealogic relations,  
91 signs of family members are determined by the first generation author. To indicate collaborative  
92 connections, AI of last authors and co-authors are negative and positive, respectively. Symbol  
93 sizes represent indicated parameters.

94

95 **Table 1. TTA-derived parameters.**

| Parameter | Description                                                                                                                                             |
|-----------|---------------------------------------------------------------------------------------------------------------------------------------------------------|
| AC        | Number of authors listed on the byline of each scientific article                                                                                       |
| AG        | Generation of an author, where AG ancestor = $i$ and AG offspring = $i+1$                                                                               |
| AI        | Chronologic index attributed to last authors                                                                                                            |
| CC        | Count of collaborative connections calculated as sum of CCout, number of co-authors, and of CCin, number of authors that listed the author as co-author |
| FS        | Family size: number of all progeny of a first generation ancestor                                                                                       |

|         |                                                                                                                                                                                                                                                                           |
|---------|---------------------------------------------------------------------------------------------------------------------------------------------------------------------------------------------------------------------------------------------------------------------------|
| OC      | Offspring count of an author: number of first authors on an author's articles that subsequently publish as last author                                                                                                                                                    |
| PC      | Number of articles as last author including single-author articles                                                                                                                                                                                                        |
| PCannu  | Mean annual count of last author articles                                                                                                                                                                                                                                 |
| PCcol   | Number of articles with collaborators: "out", number of articles where the author is last author and a collaborator is listed as co-author; "in", number of papers where the author listed as co-author. Only articles with three authors or more are taken into account. |
| PCfirst | Number of articles as first author                                                                                                                                                                                                                                        |
| PCoff   | Number of last author articles with offspring                                                                                                                                                                                                                             |
| PCy     | Number of last author articles per year                                                                                                                                                                                                                                   |
| TTP     | TeamTree product calculated as $PC \times OC \times CC$                                                                                                                                                                                                                   |

---

96

97 TTA explores three aspects of scientific production: the publication record of authors, their  
98 genealogical relations and their collaborations. Several parameters are calculated to assess  
99 performance in each category (Table 1). To summarize the publication record of each author,  
100 TTA calculates the total numbers of articles listing the author on the first (PCfirst) and last byline  
101 position (PC), the number of publications (as last author) in each year (PCy; Fig 1B; Table 1),  
102 the publication period in years and the average annual publication count (PCannu; Table 1).  
103 Single author articles are counted as last author publications. Genealogical relations between  
104 authors are derived from offspring – ancestor pairs, where offspring and ancestor are listed on  
105 the first and last byline position of an article (Fig 1B, C). Three conditions apply: First, each  
106 offspring is assigned to a single ancestor with the earliest common article defining a genealogical  
107 relation. Second, this common article has to be published before the earliest (last author)  
108 publication of the offspring. Third, the AI value of the ancestor must be smaller than the one of

109 the offspring. TTA assigns a generation index (AG) to ancestors ( $AG = i$ ) and offspring ( $AG =$   
110  $i+1$ ; Fig 1C; Table 1) and calculates for each ancestor the number of offspring (OC; Fig 1C) and  
111 the number of articles published with offspring (PCoff; Table 1). Families are defined as progeny  
112 of a first generation ancestor ( $AG = 1$ ) encompassing all offspring ( $AG > 1$ ). TTA derives  
113 collaborations based on co-authorship [30] (Fig 1B, D). For out- and in-degree connections, an  
114 author lists other authors as co-authors and an author is listed as co-author, respectively (Fig 1B).  
115 TTA calculates the numbers of these connections (CCin, CCout; Fig 1C), their sum ( $CC = CCin$   
116  $+ CCout$ ) and the number of corresponding publications per author (PCcol; Table 1). The TTA-  
117 derived metrics – PC, OC and CC – define a three-dimensional space, in which each author  
118 occupies a distinct volume reflecting publications, offspring and collaborative connections (Fig  
119 1E). The product of these parameters, further referred to as TeamTree product (TTP), defines a  
120 new metric to estimate author contributions to a research field (Fig 1E; Table 1).

121 The workforce contributing to the field is visualized by TTGs. TTGs are scatterplots where  
122 each author is represented by a symbol with the AI value and the earliest year of publication  
123 plotted on the x and y axis, respectively. The symbols are displayed with author-specific colors  
124 (Fig 1F). TTGs provide a framework to illustrate an author's contributions to each category  
125 analysed by TTA. To show the publication records, symbols connected by lines represent the  
126 years of publication with symbol sizes indicating the number of articles per year. To achieve an  
127 accessible presentation of the publication data, the sign of AI values alternates between odd  
128 (positive) and even (negative) numbers rendering a symmetric tree-like design (Fig 1F).  
129 Genealogical relations between authors are indicated by lines connecting ancestors and offspring.  
130 To represent this aspect with TTGs, the sign of the AI representing the first generation ancestor  
131 determines the AI sign of all family members (Fig 1F). To visualize collaborations in the field,



132 lines connect last authors and co-authors with AI signs adjusted to negative and positive values,  
133 and symbol sizes indicating C<sub>Out</sub> and C<sub>Cin</sub> values, respectively (Fig 1F). To represent the  
134 overall contribution of an author to the field, TTGs show authors with alternating AI signs and  
135 symbol areas representing TTP values (Fig 1F).

136 TTA is implemented with custom-written routines based on the open source software R  
137 [31] and selected R packages for data handling (data.table [32]), statistical and network analyses  
138 (igraph [33]; dunn.test [34]) and data visualization (eulerr [35]; ggfortify [36]; ggplot2 [37];  
139 ggrepel [38]; igraph [33]; plot3D [39]). The R script is freely available upon request to the author  
140 and at <https://github.com/fw-pfriege/TeamTree>. It can be used to analyse publications in a user-  
141 defined field of interest. Bibliographic records were obtained from MEDLINE using PubMed  
142 (<https://pubmed.ncbi.nlm.nih.gov/>) and from Web of Science (WoS)  
143 (<https://apps.webofknowledge.com/>; accessed via institutional subscription). To compare  
144 citation-independent TTP values with citation-based metrics, the Hirsch indices and the total  
145 number of citations were calculated from bibliographic records (WoS).

146

## 147 **Results**

148 To expose the utility of TTA, the new approach was applied to scientific articles from selected  
149 fields of research in science and technology (Table 2).

150

151 **Table 2. Selected research fields subjected to TTA.**

| Query term / Discipline                                                                 | Database | Pubs / Authors / Year |
|-----------------------------------------------------------------------------------------|----------|-----------------------|
| <i>Aplysia</i>                                                                          | PubMed   | 4738 / 1613 / 1898    |
| <i>Aplysia</i>                                                                          | WoS      | 8238 / 3321 / 1885    |
| "Chirped laser pulses" / Physics                                                        | WoS      | 7770 / 3741 / 1968    |
| "Circadian clock" / Biomedicine                                                         | PubMed   | 17162 / 6708 / 1960   |
| "Circadian clock" / Biomedicine                                                         | WoS      | 25680 / 10620 / 1960  |
| "Clustered regularly interspaced short palindromic repeats<br>OR CRISPR*" / Biomedicine | PubMed   | 20015 / 12220 / 2002  |
| "Clustered regularly interspaced short palindromic repeats<br>OR CRISPR*" / Biomedicine | WoS      | 30606 / 16283 / 2002  |
| "Cosmic inflation OR inflationary universe" / Astronomy                                 | WoS      | 3048 / 1653 / 1981    |
| "Ice core climate" / Geoscience                                                         | WoS      | 9013 / 5481 / 1956    |
| Organoid*                                                                               | PubMed   | 15333 / 10465 / 1946  |
| Organoid*[TIAB] Query limited to title and abstract                                     | PubMed   | 7427 / 4649 / 1946    |
| Organoid*                                                                               | WoS      | 13716 / 9489 / 1936   |
| "Quantum computer" OR "quantum computing" /<br>Computer Science                         | WoS      | 24914 / 9097 / 1985   |
| "Supramolecular chemistry" / Chemistry                                                  | WoS      | 28857 / 11863 / 1967  |

152 Summary of selected fields and query terms, the bibliographic source, the number of

153 publications and authors, and the first year of publication.

## 154 **Visualizing the workforce driving research fields**

155 A new type of visual named TTG reveals the ensemble of authors contributing to a topic of  
156 interest (Fig 1). To exemplify this, TTA was applied to three fields of biomedical research each  
157 of which showing distinct history, size and dynamics (Fig 2). Corresponding publications were  
158 obtained from PubMed/MEDLINE (Table 2). Research on *Aplysia*, a genus of sea slugs, started  
159 at the end of the 19th century. Since then, the field expanded slowly but steadily reaching less  
160 than 2000 authors total [40] (Fig 2A). The discovery of "clustered regularly interspaced short  
161 palindromic repeats" (CRISPR) and the subsequent development of CRISPR-derived genetic  
162 tools established a new field, whose workforce is expanding exponentially reaching more than  
163 10,000 authors within a decade [41] (Fig 2B). The field related to "organoids" shows a peculiar  
164 development. The workforce expanded transiently during the 1970ies and much of the 80ies (Fig  
165 2C), but this phase was probably due to changing definitions of the term and its assignment to  
166 publication records [42]. It is absent when only publications bearing the term in the title or  
167 abstract are taken into account (Fig 2C; Table 2). The exponential growth of the workforce  
168 within the last decade (Fig 2C) was driven by important breakthroughs suggesting organoids as  
169 models of human organs [43, 44].

170

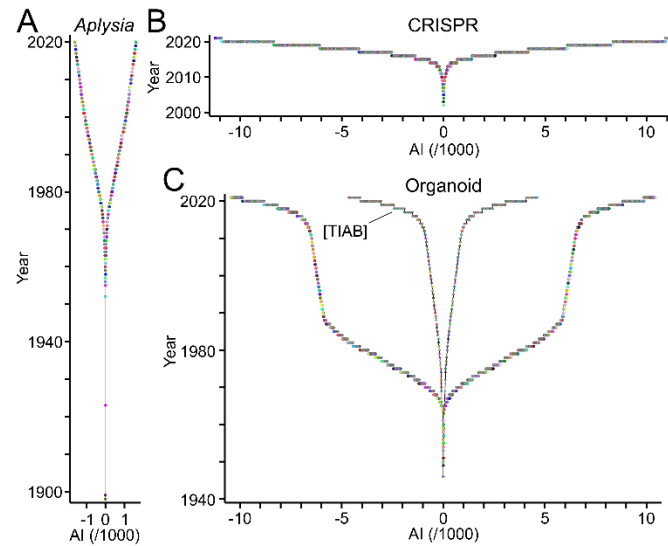

171

172 **Fig 2. TeamTree graphs showing the development of selected fields of biomedicine.**

173 TTGs reveal the distinct duration, growth and size of the workforce publishing scientific articles

174 related to *Aplysia* (A), CRISPR (B) and organoids (C). Circles represent authors contributing to

175 each field with the year of their first publication as last author plotted against their AI values.

176 Signs of AI values alternate for better accessibility. Note the distinct development of the

177 "organoid" field in panel C when only publications were analysed, where the term "organoid\*" is

178 only mentioned in the title or abstract as indicated by the field specifier [TIAB].

179

180 **Display and quantitative analysis of publication record, genealogy**

181 **and collaborations**

182 TTA evaluates the publication record of authors, the generation of offspring and the

183 establishment of collaborations. To illustrate this point, TTA was applied to publications related

184 to "circadian clock" (Clock) [45], a well-established field of biomedical research (source:

185 PubMed/MEDLINE; Table 2). Fig 3 shows the publication records of authors in the Clock field

186 using TTGs as framework. Individual authors published as many as 120 articles (PC), but 70%

187 of the workforce contributed single articles (Fig 3B). This percentage was similarly high (68%),  
188 when authors entering during the last two years were excluded. The Clock field expanded rapidly  
189 within the last decades as indicated by linearly growing annual counts of newly entering authors  
190 and of published articles per year, respectively (Fig 3C). Ranking authors by PC values identified  
191 the top contributors of articles to the Clock field (Fig 3D).

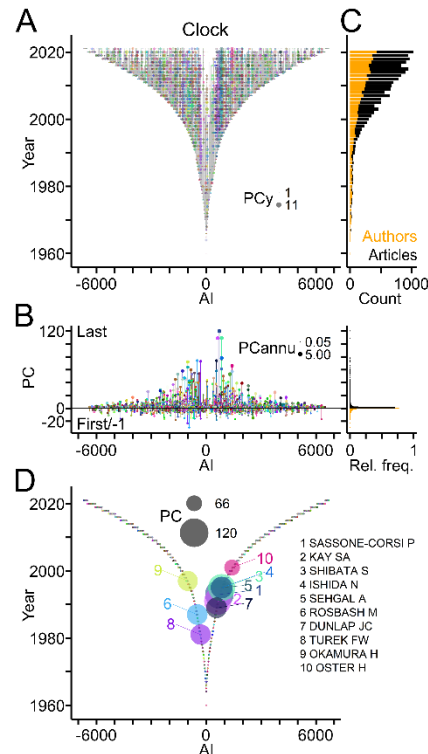

192

### 193 **Fig 3. Publication records in the Clock field.**

194 (A) TTTG showing the publication records of authors working in the Clock field. Circles  
195 connected by vertical grey lines represent for each author, the years of publications as last author  
196 plotted against the AI. Circle area indicates number of publications per author per year (PCy).  
197 (B) Left, publication counts per author indicating last and first author articles by positive and  
198 negative values, respectively. Circle area indicates the average number of publications per year  
199 (PCannu). Right, relative frequency distributions of PC values shown on the left. (C) Number of

200 authors entering the field per year (orange) and of articles (black) published per year. (D) TTG  
201 showing authors with top ten PC values indicated by circle area.  
202  
203 Fig 4 depicts genealogical relations in the Clock field based on last author – first author pairs of  
204 articles, and presents a quantitative assessment (Table 1). A quarter of authors published  
205 previously as first authors thus qualifying as offspring (Fig 3B) and 10% of the authors qualified  
206 as ancestors (Fig 4B). Ancestors generated up to 24 offspring and published up to 75 articles  
207 with their offspring (Fig 4B). Overall, the Clock field comprised 506 families with up to 40  
208 members spanning maximally 6 generations (Fig 4B). For the last two decades offspring authors  
209 and publications with offspring represented a small, but constant fraction of the workforce  
210 entering the field each year and of the annual scientific production (Fig 4C). Ranking by OC  
211 values revealed the most prolific authors and their families in the Clock field (Fig 4D).

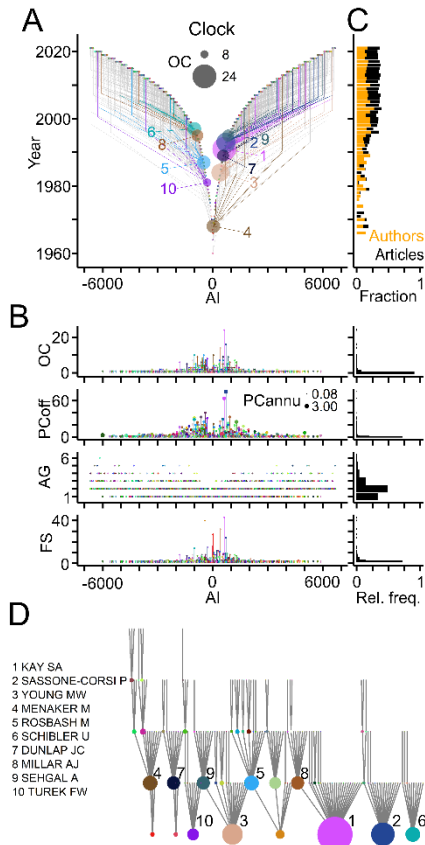

212

213 **Fig 4. Genealogical relations in the Clock field.**

214 (A) TTTG showing genealogic relations derived from publications. Circles and grey lines indicate

215 ancestor-to-offspring connections. Connections of authors with the ten largest offspring count

216 (OC) values are shown in color (names indicated in panel D). Circle area indicates OC. AI signs

217 of offspring and of ancestors were adjusted to the first generation ancestor. (B) Left, from top to

218 bottom, OC values, number of articles with offspring (PCoff), author generation (AG) and family

219 size (FS). Circle area indicates PCannu. Right, relative frequency distributions of parameters

220 shown on the left. (C) Fraction of offspring authors (orange) entering the field and of

221 publications with offspring (black) compared to total numbers per year. (D) Names and family

222 connections of authors with top ten OC values indicated by circle area.

223

224 Fig 5 shows collaborative connections in the Clock field based on co-authorship and quantitative  
225 data using collaboration-specific parameters (Table 1). In total, half of the authors in the Clock  
226 field established a variable number of out- and in-degree collaborations with up to 90 authors  
227 and published up to 104 collaborative papers as last and co-author, respectively (Fig 5B). During  
228 the last two decades, collaborators represented half of the new authors entering per year and their  
229 contribution remained fairly constant (Fig 5C). The number of authors per article increased  
230 steadily (Fig 5A). Ranking authors based on collaboration counts revealed strongly connected  
231 teams in the field and their networks (Fig 5D).

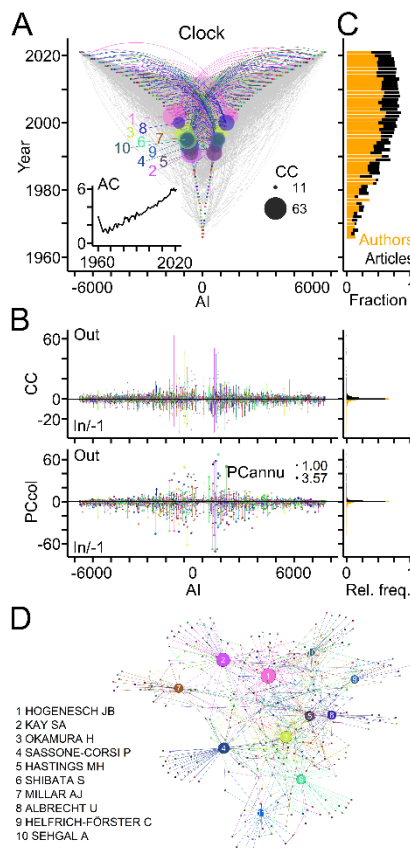

232

### 233 Fig 5. Collaborative connections in the Clock field.

234 (A) TTG showing collaborations between last authors (out; negative AI) and co-authors (in;  
235 positive AI) derived from co-authorship on scientific articles. Connections of authors with ten  
236 highest connection count (CC) values (in+out) are shown in color. Circle areas indicate CCout



237 and CCin values of these authors. Inset shows the mean author count (AC) per article published  
238 each year. (B) Left, counts of collaborators and of collaborative articles per author. Circle area  
239 indicates PCannu. Right, relative frequency distributions of parameters shown on the left. (C)  
240 Fractions of new collaborating authors (orange) and of collaborative publications (black)  
241 compared to total numbers per year. (D) Names of authors with top ten CC values and their  
242 networks. Circle area indicates CC values normalized to the maximum.

243

## 244 **Workforce dynamics and field development**

245 TTA was used to explore how the workforce of the Clock field developed over time. Plotting the  
246 number of authors entering and exiting the field based on the first and last year of their  
247 publications, respectively, indicated strong growth of the workforce. The accuracy of exit counts  
248 decreases for the last years (Fig 6). The publication periods or life-spans of authors reached  
249 nearly five decades, but the large majority published only during one year and in most cases a  
250 single article (Fig 3C; Fig 6A-C). Separating "Newcomers" entering the field per year from  
251 "Established" authors revealed that the established workforce consisted mostly of authors with  
252 genealogical and collaborative ties, whereas most newcomers had collaborative connections or  
253 no ties and contributed single articles (Fig 6D).

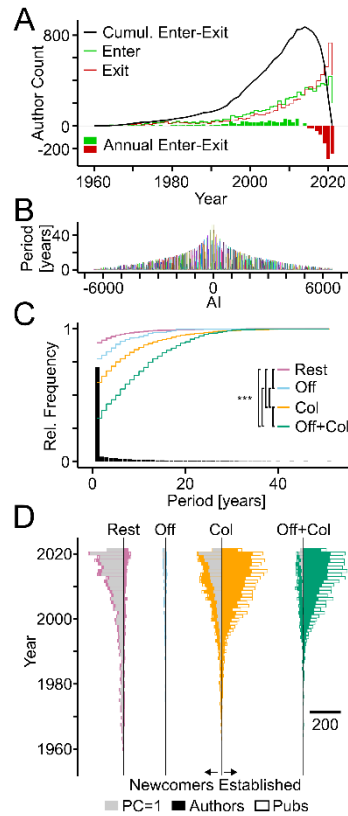

254

255 **Fig 6. Workforce dynamics in the Clock field.**

256 (A) Annual counts of authors entering (green bars) and leaving the field (red bars)

257 showing cumulative sums. (B) Publication periods of individual authors in years. (C) Bars and

258 lines showing the relative frequencies of all publication periods and the cumulative relative

259 frequencies of publication periods of authors from indicated categories, respectively. Col,

260 authors with collaborative but no genealogical connections; Off, genealogical but no

261 collaborative connections; Off+Col, both types of connections; Rest, without connections.

262 Statistically significant differences among groups are indicated (Kruskal-Wallis tests chi-squared

263 = 265.12,  $df = 3$ ,  $p < 0.0001$ . Asterisks indicate level of significance: \*\*\*,  $p < 0.001$ ; post-hoc

264 Dunn test, Benjamini-Hochberg adjusted; sample size = 256; adjusted to smallest sample size by

265 random selection). (D) Horizontal bars indicate number of authors (filled) and of publications

266 (white) per year of newcomers (left) and established teams (right) from the indicated categories.

267 Grey bars indicate authors with single publications. Scale bar indicates number of authors and  
268 publications.

269

## 270 **Evaluation of scientific production based on publications, offspring** 271 **and collaborations**

272 A key goal of bibliometric analyses is to gauge author impact on a field of research. The new  
273 metric TTP takes into account an author's publication record (PC), offspring generation (OC) and  
274 collaborations (CC) (Table 1). The concept was introduced with generic publications (Fig 1). Its  
275 validity was tested first using publications related to the Clock field (Fig 7). Intersection of the  
276 top 100 authors ranked by three key parameters showed that a core of 43 authors figured among  
277 the top in all three categories (Fig 7A). Three-dimensional scatterplots of the parameters revealed  
278 that authors occupy distinct volumes (Fig 7B) indicating that TTP, calculated as product  $PC \times$   
279  $OC \times CC$ , allows for a more differentiated author ranking than each parameter alone. Fig 7C  
280 shows authors with top ten TTP values in the Clock field. To validate its utility, TTP was  
281 compared with frequently used citation-based benchmarks of author performance. Scatterplots  
282 and statistical analyses revealed that TTP values of individual authors working in the Clock field  
283 correlated with the total numbers of citing articles ( $\rho = 0.828$ ;  $p < 0.001$ ) and with their H indices  
284 ( $\rho = 0.924$ ;  $p < 0.001$ ;  $n = 731$ ; Spearman's rank correlation; Fig 7D).

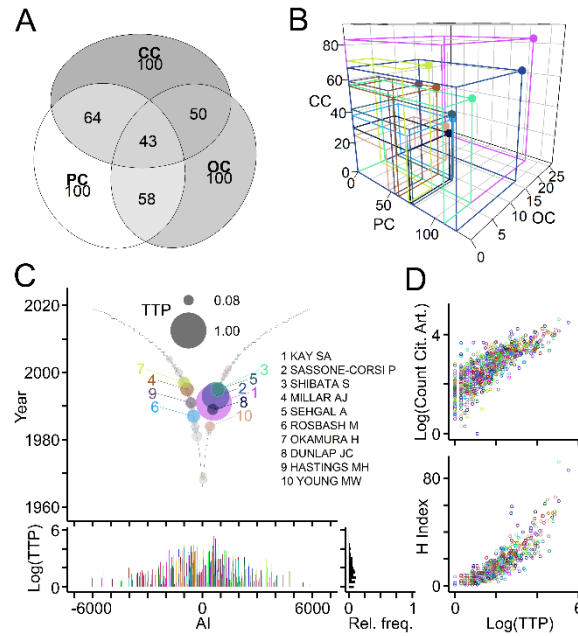

285

286 **Fig 7. Introduction of TeamTree product as new measure of scientific production.**

287 (A) Numbers of intersecting authors in the Clock field ranking among top 100 for each  
288 parameter (PC, OC, CC). (B) Scatterplot of indicated parameters for authors with top ten  
289 TeamTree product (TTP) values calculated as the volume occupied by each author ( $PC \times OC \times$   
290  $CC$ ). (C) Top, graph showing the TTP of authors in the Clock field with colored circles and  
291 names indicating authors with ten highest values. Grey circles with colored border indicate  
292 authors with TTP values above zero. Circle size indicates  $\log_{10}(TTP)$  normalized to maximum.  
293 Bottom,  $\log_{10}(TTP)$  values and their relative frequency distribution. (D) Scatterplots, where  
294 circles represent individual authors (indicated by color) with their total number of citing articles  
295 (top;  $\log_{10}$  values) and their H indices (bottom) plotted against their TTP ( $\log_{10}$  values).

296

297 To further validate TTP as citation-independent measure of productivity, TTA was applied to  
298 publications from the fields of biomedical research shown in Fig 2 and to selected fields of  
299 science and technology (Table 2). As shown in Fig 8, the TTP values of authors correlated

300 significantly with their H indices and citation counts across fields and disciplines (Fig 8A), and  
 301 ranking authors by TTP values identified key players in each field (Fig 8B).

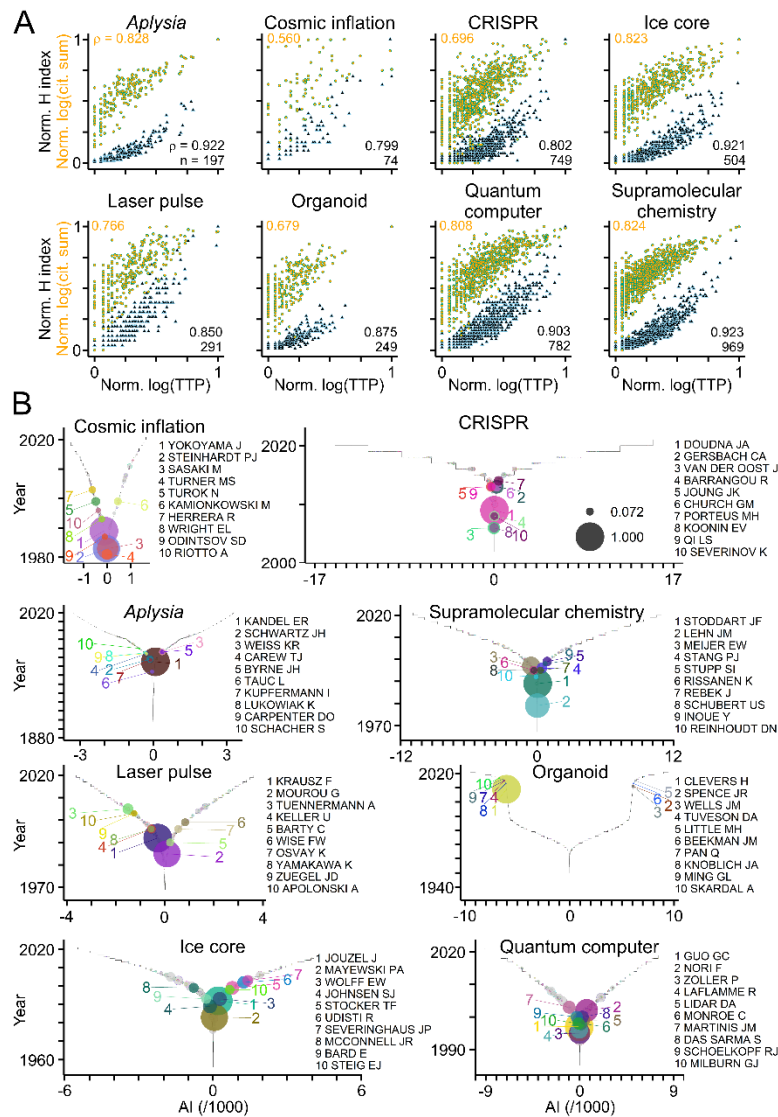

302

303 **Fig 8. TTP-based evaluation across fields and disciplines.**

304 (A) Scatterplots where circles represent individual authors publishing in the selected fields of  
 305 science and technology (Table 2) with their H indices (black-blue triangles; normalized to  
 306 maximum) and sum of citations (orange-green circles; log10 values normalized to maximum)  
 307 plotted against their TTP values (log10 values normalized to maximum). Numbers indicate rho  
 308 values and sample sizes (Spearman's correlation test;  $p < 0.0001$  for all comparisons). (B)

309 Graphs showing TTP values of authors in selected fields with colored circles and names  
310 indicating authors with ten highest TTP values. Grey circles with colored border indicate authors  
311 with TTP values above zero. Circle size indicates  $\log_{10}(\text{TTP})$  normalized to maximum.

312

## 313 **Discussion**

314 TTA fills a gap between global investigations of the scientific endeavour and the recurrent need  
315 to identify and evaluate the teams working on a user-defined topic of interest in science and  
316 technology.

317 A prime feature is the new measure to estimate scientific production named TTP. Several  
318 aspects distinguish this metric from existing author-level indicators. TTP takes into account three  
319 important aspects of research activity: the publication of peer-reviewed scientific articles, the  
320 training and mentoring of junior scientists, who continue their career within the field, and the  
321 establishment of collaborative connections that signify recognition due to specific expertise and  
322 capacities. The respective parameters are derived solely from the author(s) of scientific articles  
323 and the year of publication. Thus, TTP estimates scientific production independently from  
324 citation counts and augments the group of indicators that do not rely on this factor [46-49].

325 Notably, the significant correlation of TTP values of authors with their numbers of citations and  
326 their H indices in all fields tested indicates the usefulness of the new measure. A second feature  
327 introduced here are new visuals named TTGs that provide users with ad-hoc views on the  
328 workforce driving a field. They reveal its origin, development and size, and expose the  
329 publication records of authors as well as their genealogical and collaborative connections. These  
330 graphs complement present approaches to display bibliometric information and to visualize  
331 different aspects of scientific production [50-58].

332 TTA exposes factors that impact the workforce development of a field. For example, the  
333 calculation of publication periods revealed that few authors contributed for more than one year to  
334 the Clock field. This finding supports previous reports that in many research areas only a small  
335 fraction of the workforce publishes during long periods of time [59]. The delineation of families  
336 and collaborator networks in the Clock field revealed that genealogical and collaborative  
337 connections prolong the life-span of authors. These observations are in line with studies showing  
338 the relevance of training and mentorship [60-64] and the importance of collaborations [65-72].  
339 The automatic delineation of family connections from first author-last author pairs provides an  
340 alternative to efforts requiring user input [73-75] (<https://www.genealogy.math.ndsu.nodak.edu/>,  
341 <https://academictree.org/>). However, TTA underestimates offspring counts in the case of co-first  
342 or co-last authorship, of alphabetical author lists or of field-specific author ranking [76, 77].  
343 Other caveats should be mentioned: TTP values are field-specific, scale with the size of research  
344 groups and depend on the publication period of authors. Therefore, TTP-based ranking is  
345 context-dependent and unsuited to evaluate junior scientists [78]. Moreover, TTP is highly  
346 selective as only a fraction of authors has non-zero values, and it cannot value innovative,  
347 ground-breaking contributions from small teams or from teams that contribute only briefly to a  
348 field. TTA like all other name-dependent approaches faces the challenge of author  
349 disambiguation, which can be mitigated by assignment of unique author identifiers  
350 (<https://orcid.org/>) and computational algorithms [5, 29, 79-83]. Honorary and ghost authorship  
351 will confound results of TTA depending on their prevalence in the field [84, 85].

352 Peer-reviewed articles were used to introduce the features of TTA as this form of  
353 publication represents the core of scientific production [1], but the approach may also be applied  
354 to other types of publications such as preprints [86] and patents [87]. Future versions of TTA

355 should provide web-based access to TTA allowing for direct retrieval and immediate processing  
356 of bibliographic information and the interactive display of results.

357

## 358 **Acknowledgments**

359 The author thanks V. Demais, S. Eglén, N. Elghobashi-Meinhardt, J. Jouzel, J.M. Lehn, M.

360 Muzet, V. Pallottini, J.L. Paluh, B. Poulain, H. Runz, J.P. Sauvage, D. Schulte, S. Silber and M.

361 Slezak for helpful discussions and comments on previous versions of the manuscript.

362



## 363 **References**

- 364 1. Tennant JP, Ross-Hellauer T. The limitations to our understanding of peer review.  
365 Research integrity and peer review. 2020;5:6. Epub 2020/05/06. doi: 10.1186/s41073-020-  
366 00092-1. PubMed PMID: 32368354; PubMed Central PMCID: PMCPMC7191707.
- 367 2. Bornmann L, Mutz R. Growth rates of modern science: A bibliometric analysis based on  
368 the number of publications and cited references. J Assoc Inf Sci Technol. 2015;66(11):2215-22.  
369 doi: 10.1002/asi.23329.
- 370 3. Clauset A, Larremore DB, Sinatra R. Data-driven predictions in the science of science.  
371 Science. 2017;355(6324):477-80. doi: 10.1126/science.aal4217. PubMed PMID:  
372 WOS:000393183100032.
- 373 4. Mukherjee S, Romero DM, Jones B, Uzzi B. The nearly universal link between the age of  
374 past knowledge and tomorrow's breakthroughs in science and technology: The hotspot. Science  
375 advances. 2017;3(4):e1601315. Epub 2017/04/26. doi: 10.1126/sciadv.1601315. PubMed PMID:  
376 28439537; PubMed Central PMCID: PMCPMC5397134.
- 377 5. Zeng A, Shen ZS, Zhou JL, Wu JS, Fan Y, Wang YG, et al. The science of science: From  
378 the perspective of complex systems. Phys Rep. 2017;714:1-73. doi:  
379 10.1016/j.physrep.2017.10.001. PubMed PMID: WOS:000418464100001.
- 380 6. Fortunato S, Bergstrom CT, Borner K, Evans JA, Helbing D, Milojevic S, et al. Science  
381 of science. Science. 2018;359(6379). Epub 2018/03/03. doi: 10.1126/science.aa0185. PubMed  
382 PMID: 29496846; PubMed Central PMCID: PMCPMC5949209.
- 383 7. Fire M, Guestrin C. Over-optimization of academic publishing metrics: observing  
384 Goodhart's Law in action. GigaScience. 2019;8(6). Epub 2019/05/31. doi:

- 385 10.1093/gigascience/giz053. PubMed PMID: 31144712; PubMed Central PMCID:  
386 PMCPMC6541803.
- 387 8. Hardwicke TE, Serghiou S, Janiaud P, Danchev V, Crüwell S, Goodman SN, et al.  
388 Calibrating the Scientific Ecosystem Through Meta-Research. *Annu Rev Stat Appl.*  
389 2020;7(1):null. doi: 10.1146/annurev-statistics-031219-041104.
- 390 9. Harzing AW, Alakangas S. Google Scholar, Scopus and the Web of Science: a  
391 longitudinal and cross-disciplinary comparison. *Scientometrics.* 2016;106(2):787-804. doi:  
392 10.1007/s11192-015-1798-9. PubMed PMID: WOS:000369017300015.
- 393 10. Gusenbauer M, Haddaway NR. Which academic search systems are suitable for  
394 systematic reviews or meta-analyses? Evaluating retrieval qualities of Google Scholar, PubMed,  
395 and 26 other resources. *Research Synthesis Methods.* 2020;11(2):181-217. doi:  
396 10.1002/jrsm.1378. PubMed PMID: WOS:000509659900001.
- 397 11. Agarwal P, Searls DB. Can literature analysis identify innovation drivers in drug  
398 discovery? *Nature Reviews Drug Discovery.* 2009;8(11):865-78. doi: 10.1038/nrd2973. PubMed  
399 PMID: WOS:000271388200020.
- 400 12. Cunningham H, Tablan V, Roberts A, Bontcheva K. Getting More Out of Biomedical  
401 Documents with GATE's Full Lifecycle Open Source Text Analytics. *PLOS Computational*  
402 *Biology.* 2013;9(2):e1002854. doi: 10.1371/journal.pcbi.1002854.
- 403 13. Chen Q, Lee K, Yan S, Kim S, Wei CH, Lu Z. BioConceptVec: Creating and evaluating  
404 literature-based biomedical concept embeddings on a large scale. *PLoS Comput Biol.*  
405 2020;16(4):e1007617. Epub 2020/04/24. doi: 10.1371/journal.pcbi.1007617. PubMed PMID:  
406 32324731; PubMed Central PMCID: PMCPMC7237030.

- 
- 407 14. Venkatakrisnan AJ, Puranik A, Anand A, Zemmour D, Yao X, Wu X, et al. Knowledge  
408 synthesis of 100 million biomedical documents augments the deep expression profiling of  
409 coronavirus receptors. *eLife*. 2020;9:e58040. doi: 10.7554/eLife.58040.
- 410 15. Dridi A, Gaber MM, Azad RMA, Bhogal J. Scholarly data mining: A systematic review  
411 of its applications. *Wiley Interdisciplinary Reviews-Data Mining and Knowledge Discovery*.  
412 2021;11(2). doi: 10.1002/widm.1395. PubMed PMID: WOS:000587964800001.
- 413 16. Rivest M, Vignola-Gagne E, Archambault E. Article-level classification of scientific  
414 publications: A comparison of deep learning, direct citation and bibliographic coupling. *PloS*  
415 *one*. 2021;16(5):e0251493-e. doi: 10.1371/journal.pone.0251493. PubMed PMID:  
416 MEDLINE:33974653.
- 417 17. Cronin B. Hyperauthorship: A postmodern perversion or evidence of a structural shift in  
418 scholarly communication practices? *Journal of the American Society for Information Science*  
419 *and Technology*. 2001;52(7):558-69. doi: 10.1002/asi.1097. PubMed PMID:  
420 WOS:000168426400005.
- 421 18. Claxton LD. Scientific authorship: Part 2. History, recurring issues, practices, and  
422 guidelines. *Mutation Research/Reviews in Mutation Research*. 2005;589(1):31-45. doi:  
423 <https://doi.org/10.1016/j.mrrev.2004.07.002>.
- 424 19. Marusic A, Bosnjak L, Jeronic A. A Systematic Review of Research on the Meaning,  
425 Ethics and Practices of Authorship across Scholarly Disciplines. *Plos One*. 2011;6(9). doi:  
426 10.1371/journal.pone.0023477. PubMed PMID: WOS:000294802800004.
- 427 20. Sauermann H, Haeussler C. Authorship and contribution disclosures. *Science advances*.  
428 2017;3(11):e1700404. Epub 2017/11/21. doi: 10.1126/sciadv.1700404. PubMed PMID:  
429 29152564; PubMed Central PMCID: PMC5687853.

- 430 21. Holcombe AO. Contributorship, Not Authorship: Use CRediT to Indicate Who Did  
431 What. *Publications*. 2019;7(3). doi: 10.3390/publications7030048. PubMed PMID:  
432 WOS:000487987700001.
- 433 22. Hicks D, Wouters P, Waltman L, de Rijcke S, Rafols I. The Leiden Manifesto for  
434 research metrics. *Nature*. 2015;520(7548):429-31. doi: 10.1038/520429a. PubMed PMID:  
435 WOS:000353334500013.
- 436 23. Hirsch JE. An index to quantify an individual's scientific research output. *Proceedings of*  
437 *the National Academy of Sciences of the United States of America*. 2005;102(46):16569-72.  
438 Epub 2005/11/09. doi: 10.1073/pnas.0507655102. PubMed PMID: 16275915; PubMed Central  
439 PMCID: PMCPMC1283832.
- 440 24. Garfield E. The History and Meaning of the Journal Impact Factor. *JAMA*.  
441 2006;295(1):90-3. doi: 10.1001/jama.295.1.90.
- 442 25. Docampo D, Bessoule J-J. A new approach to the analysis and evaluation of the research  
443 output of countries and institutions. *Scientometrics*. 2019;119(2):1207-25. doi: 10.1007/s11192-  
444 019-03089-w.
- 445 26. Waltman L. A review of the literature on citation impact indicators. *Journal of*  
446 *Informetrics*. 2016;10(2):365-91. doi: 10.1016/j.joi.2016.02.007. PubMed PMID:  
447 WOS:000377413800004.
- 448 27. Aksnes DW, Langfeldt L, Wouters P. Citations, Citation Indicators, and Research  
449 Quality: An Overview of Basic Concepts and Theories. *Sage Open*. 2019;9(1). doi:  
450 10.1177/2158244019829575. PubMed PMID: WOS:000458649200001.
- 451 28. Braithwaite J, Herkes J, Churrua K, Long JC, Pomare C, Boyling C, et al.  
452 Comprehensive Researcher Achievement Model (CRAM): a framework for measuring

- 453 researcher achievement, impact and influence derived from a systematic literature review of  
454 metrics and models. *BMJ Open*. 2019;9(3):e025320. doi: 10.1136/bmjopen-2018-025320.
- 455 29. Milojevic S. Accuracy of simple, initials-based methods for author name disambiguation.  
456 *Journal of Informetrics*. 2013;7(4):767-73. doi: 10.1016/j.joi.2013.06.006. PubMed PMID:  
457 WOS:000327920400001.
- 458 30. Newman ME. The structure of scientific collaboration networks. *Proceedings of the*  
459 *National Academy of Sciences of the United States of America*. 2001;98(2):404-9. Epub  
460 2001/01/10. doi: 10.1073/pnas.021544898. PubMed PMID: 11149952; PubMed Central PMCID:  
461 PMC14598.
- 462 31. R Core Team. *R: A Language and Environment for Statistical Computing*. Vienna,  
463 Austria: R Foundation for Statistical Computing; 2019.
- 464 32. Dowle M. *data.table: Extension of 'data.frame'* 2019. Available from: [https://CRAN.R-](https://CRAN.R-project.org/package=data.table)  
465 [project.org/package=data.table](https://CRAN.R-project.org/package=data.table).
- 466 33. Csardi GN, T. The igraph software package for complex network research. *InterJournal*.  
467 2006;Complex Systems:1695.
- 468 34. Dinno A. *dunn.test: Dunn's Test of Multiple Comparisons Using Rank Sums*. 2017.
- 469 35. Larsson J. *eulerr: Area-Proportional Euler and Venn Diagrams with Ellipses*. 2019.
- 470 36. Tang YH, M.; Li, W. *ggfortify: Unified Interface to Visualize Statistical Result of*  
471 *Popular R Packages*. *The R Journal*. 2016;8(2).
- 472 37. Wickham H. *Ggplot2: Elegant Graphics for Data Analysis*. New York: Springer-Verlag;  
473 2016.

- 474 38. Slowikowski KS, A.; Hughes, S.; Lukauskas, S.; Irisson, J.O.; Kamvar, Z.N.; Thompson,  
475 R.; Dervieux, C.; Yutani, H.; Gramme, P. ggrepel: Automatically Position Non-Overlapping  
476 Text Labels with  
477 'ggplot2'. 2018.
- 478 39. Soetaert K. plot3D: Plotting Multi-Dimensional Data. 2017.
- 479 40. Moroz LL. Aplysia. *Current biology : CB*. 2011;21(2):R60-1. Epub 2011/01/25. doi:  
480 10.1016/j.cub.2010.11.028. PubMed PMID: 21256433; PubMed Central PMCID:  
481 PMCPMC4024469.
- 482 41. Hille F, Richter H, Wong SP, Bratovič M, Ressel S, Charpentier E. The Biology of  
483 CRISPR-Cas: Backward and Forward. *Cell*. 2018;172(6):1239-59. doi:  
484 <https://doi.org/10.1016/j.cell.2017.11.032>.
- 485 42. Simian M, Bissell MJ. Organoids: A historical perspective of thinking in three  
486 dimensions. *The Journal of cell biology*. 2017;216(1):31-40. Epub 12/28. doi:  
487 10.1083/jcb.201610056. PubMed PMID: 28031422.
- 488 43. Lancaster MA, Knoblich JA. Organogenesis in a dish: Modeling development and  
489 disease using organoid technologies. *Science*. 2014;345(6194):1247125. doi:  
490 10.1126/science.1247125.
- 491 44. Garreta E, Kamm RD, Chuva de Sousa Lopes SM, Lancaster MA, Weiss R, Treppe X, et  
492 al. Rethinking organoid technology through bioengineering. *Nature Materials*. 2021;20(2):145-  
493 55. doi: 10.1038/s41563-020-00804-4.
- 494 45. Patke A, Young MW, Axelrod S. Molecular mechanisms and physiological importance  
495 of circadian rhythms. *Nature Reviews Molecular Cell Biology*. 2020;21(2):67-84. doi:  
496 10.1038/s41580-019-0179-2.

- 497 46. Liu X, Bollen J, Nelson ML, Van De Sompel H, Egghe L. Co-authorship networks in the  
498 digital library research community. *Infometrics*. 2005;41(6):1462--80. PubMed PMID:  
499 edsfra.17035814.
- 500 47. Sugimoto CR, Work S, Lariviere V, Haustein S. Scholarly Use of Social Media and  
501 Altmetrics: A Review of the Literature. *Journal of the Association for Information Science and*  
502 *Technology*. 2017;68(9):2037-62. doi: 10.1002/asi.23833. PubMed PMID:  
503 WOS:000407793000001.
- 504 48. Bornmann L, Haunschild R. Normalization of zero-inflated data: An empirical analysis  
505 of a new indicator family and its use with altmetrics data. *Journal of Informetrics*.  
506 2018;12(3):998-1011. doi: 10.1016/j.joi.2018.01.010. PubMed PMID: WOS:000442670600029.
- 507 49. Tahamtan I, Bornmann L. Altmetrics and societal impact measurements: Match or  
508 mismatch? A literature review. *Profesional De La Informacion*. 2020;29(1). doi:  
509 10.3145/epi.2020.ene.02. PubMed PMID: WOS:000531809400002.
- 510 50. Börner K, Chen C, Boyack KW. Visualizing knowledge domains. *Annual Review of*  
511 *Information Science & Technology*. 2003;37(1):179--255. doi: 10.1002/aris.1440370106.  
512 PubMed PMID: 64982071.
- 513 51. Chen C. Citespace II : Detecting and visualizing emerging trends and transient patterns in  
514 scientific literature. *Journal of the American Society for Information Science and Technology*  
515 (Print). 2006;57(3):359--77. PubMed PMID: edsfra.17473696.
- 516 52. van Eck NJ, Waltman L. Software survey: VOSviewer, a computer program for  
517 bibliometric mapping. *Scientometrics*. 2010;84(2):523-38. doi: 10.1007/s11192-009-0146-3.
- 518 53. Cobo MJ, Lopez-Herrera AG, Herrera-Viedma E, Herrera F. SciMAT: A new science  
519 mapping analysis software tool. *Journal of the American Society for Information Science and*

- 520 Technology. 2012;63(8):1609-30. doi: 10.1002/asi.22688. PubMed PMID:  
521 WOS:000306758600010.
- 522 54. Marx W, Bornmann L, Barth A, Leydesdorff L. Detecting the Historical Roots of  
523 Research Fields by Reference Publication Year Spectroscopy (RPYS). Journal of the Association  
524 for Information Science & Technology. 2014;65(4):751--64. doi: 10.1002/asi.23089. PubMed  
525 PMID: 94969748.
- 526 55. van Eck NJ, Waltman L. CitNetExplorer: A new software tool for analyzing and  
527 visualizing citation networks. 2014. p. 802.
- 528 56. Aria M, Cuccurullo C. bibliometrix: An R-tool for comprehensive science mapping  
529 analysis. Journal of Informetrics. 2017;11(4):959-75. doi:  
530 <https://doi.org/10.1016/j.joi.2017.08.007>.
- 531 57. Bornmann L, Haunschild R. Plots for visualizing paper impact and journal impact of  
532 single researchers in a single graph. Scientometrics. 2018;115(1):385-94. doi: 10.1007/s11192-  
533 018-2658-1. PubMed PMID: WOS:000426807700020.
- 534 58. Moral-Munoz JA, Herrera-Viedma E, Santisteban-Espejo A, Cobo MJ. Software tools for  
535 conducting bibliometric analysis in science: An up-to-date review. Profesional De La  
536 Informacion. 2020;29(1). doi: 10.3145/epi.2020.ene.03. PubMed PMID:  
537 WOS:000531809400004.
- 538 59. Ioannidis JP, Boyack KW, Klavans R. Estimates of the continuously publishing core in  
539 the scientific workforce. PLoS One. 2014;9(7):e101698. Epub 2014/07/10. doi:  
540 10.1371/journal.pone.0101698. PubMed PMID: 25007173; PubMed Central PMCID:  
541 PMCPMC4090124.



- 542 60. Malmgren RD, Ottino JM, Nunes Amaral LA. The role of mentorship in protégé  
543 performance. *Nature*. 2010;465(7298):622-6. doi: 10.1038/nature09040.
- 544 61. Lienard JF, Achakulvisut T, Acuna DE, David SV. Intellectual synthesis in mentorship  
545 determines success in academic careers. *Nature communications*. 2018;9(1):4840. Epub  
546 2018/11/30. doi: 10.1038/s41467-018-07034-y. PubMed PMID: 30482900; PubMed Central  
547 PMCID: PMC6258699.
- 548 62. Sekara V, Deville P, Ahnert SE, Barabasi AL, Sinatra R, Lehmann S. The chaperone  
549 effect in scientific publishing. *Proceedings of the National Academy of Sciences of the United*  
550 *States of America*. 2018;115(50):12603-7. Epub 2018/12/12. doi: 10.1073/pnas.1800471115.  
551 PubMed PMID: 30530676; PubMed Central PMCID: PMC6294962.
- 552 63. Li W, Aste T, Caccioli F, Livan G. Early coauthorship with top scientists predicts success  
553 in academic careers. *Nature communications*. 2019;10(1):5170. Epub 2019/11/16. doi:  
554 10.1038/s41467-019-13130-4. PubMed PMID: 31729362; PubMed Central PMCID:  
555 PMC6858367.
- 556 64. Ma YF, Mukherjee S, Uzzi B. Mentorship and protege success in STEM fields.  
557 *Proceedings of the National Academy of Sciences of the United States of America*.  
558 2020;117(25):14077-83. doi: 10.1073/pnas.1915516117. PubMed PMID:  
559 WOS:000546772500009.
- 560 65. Melin G, Persson O. Studying research collaboration using co-authorships.  
561 *Scientometrics*. 1996;36(3):363-77. doi: 10.1007/bf02129600. PubMed PMID:  
562 WOS:A1996VG50500006.

- 563 66. Barabási AL, Jeong H, Néda Z, Ravasz E, Schubert A, Vicsek T. Evolution of the social  
564 network of scientific collaborations. *Physica A: Statistical Mechanics and its Applications*.  
565 2002;311(3):590-614. doi: [https://doi.org/10.1016/S0378-4371\(02\)00736-7](https://doi.org/10.1016/S0378-4371(02)00736-7).
- 566 67. Wuchty S, Jones BF, Uzzi B. The increasing dominance of teams in production of  
567 knowledge. *Science*. 2007;316(5827):1036-9. Epub 2007/04/14. doi: 10.1126/science.1136099.  
568 PubMed PMID: 17431139.
- 569 68. Milojevic S. Principles of scientific research team formation and evolution. *Proceedings*  
570 *of the National Academy of Sciences of the United States of America*. 2014;111(11):3984-9.  
571 Epub 2014/03/05. doi: 10.1073/pnas.1309723111. PubMed PMID: 24591626; PubMed Central  
572 PMCID: PMC3964124.
- 573 69. Lariviere V, Gingras Y, Sugimoto CR, Tsou A. Team size matters: Collaboration and  
574 scientific impact since 1900. *Journal of the Association for Information Science and Technology*.  
575 2015;66(7):1323-32. doi: 10.1002/asi.23266. PubMed PMID: WOS:000355858200002.
- 576 70. Fonseca Bde P, Sampaio RB, Fonseca MV, Zicker F. Co-authorship network analysis in  
577 health research: method and potential use. *Health research policy and systems*. 2016;14(1):34.  
578 Epub 2016/05/04. doi: 10.1186/s12961-016-0104-5. PubMed PMID: 27138279; PubMed Central  
579 PMCID: PMC4852432.
- 580 71. Parish AJ, Boyack KW, Ioannidis JPA. Dynamics of co-authorship and productivity  
581 across different fields of scientific research. *PLoS One*. 2018;13(1):e0189742. Epub 2018/01/11.  
582 doi: 10.1371/journal.pone.0189742. PubMed PMID: 29320509; PubMed Central PMCID:  
583 PMC5761855.
- 584 72. Ahmadpoor M, Jones BF. Decoding team and individual impact in science and invention.  
585 *Proceedings of the National Academy of Sciences of the United States of America*.

- 586 2019;116(28):13885-90. Epub 2019/06/27. doi: 10.1073/pnas.1812341116. PubMed PMID:  
587 31235568; PubMed Central PMCID: PMC6628781.
- 588 73. David SV, Hayden BY. Neurotree: a collaborative, graphical database of the academic  
589 genealogy of neuroscience. PLoS One. 2012;7(10):e46608. Epub 2012/10/17. doi:  
590 10.1371/journal.pone.0046608. PubMed PMID: 23071595; PubMed Central PMCID:  
591 PMCPMC3465338.
- 592 74. Hirshman BR, Tang JA, Jones LA, Proudfoot JA, Carley KM, Marshall L, et al. Impact  
593 of medical academic genealogy on publication patterns: An analysis of the literature for surgical  
594 resection in brain tumor patients. Annals of neurology. 2016;79(2):169-77. Epub 2016/01/05.  
595 doi: 10.1002/ana.24569. PubMed PMID: 26727354.
- 596 75. Sanyal DK, Dey S, Das PP. g(m)-index: a new mentorship index for researchers.  
597 Scientometrics. 2020;123(1):71-102. doi: 10.1007/s11192-020-03384-x. PubMed PMID:  
598 WOS:000516437800003.
- 599 76. Frandsen TF, Nicolaisen J. What is in a name? Credit assignment practices in different  
600 disciplines. Journal of Informetrics. 2010;4(4):608-17. doi: 10.1016/j.joi.2010.06.010. PubMed  
601 PMID: WOS:000281616200015.
- 602 77. Waltman L. An empirical analysis of the use of alphabetical authorship in scientific  
603 publishing. Journal of Informetrics. 2012;6(4):700-11. doi: 10.1016/j.joi.2012.07.008. PubMed  
604 PMID: WOS:000308581700029.
- 605 78. Schimanski LA, Alperin JP. The evaluation of scholarship in academic promotion and  
606 tenure processes: Past, present, and future. F1000Research. 2018;7:1605-. doi:  
607 10.12688/f1000research.16493.1. PubMed PMID: MEDLINE:30647909.

- 608 79. Torvik VI, Smalheiser NR. Author Name Disambiguation in MEDLINE. *Acm*  
609 *Transactions on Knowledge Discovery from Data*. 2009;3(3). doi: 10.1145/1552303.1552304.  
610 PubMed PMID: WOS:000208168000001.
- 611 80. Tang L, Walsh JP. Bibliometric fingerprints: name disambiguation based on approximate  
612 structure equivalence of cognitive maps. *Scientometrics*. 2010;84(3):763-84. doi:  
613 10.1007/s11192-010-0196-6. PubMed PMID: WOS:000280274400014.
- 614 81. D'Angelo CA, Giuffrida C, Abramo G. A Heuristic Approach to Author Name  
615 Disambiguation in Bibliometrics Databases for Large-Scale Research Assessments. *Journal of*  
616 *the American Society for Information Science and Technology*. 2011;62(2):257-69. doi:  
617 10.1002/asi.21460. PubMed PMID: WOS:000286687300005.
- 618 82. Glänzel W, Heeffer S, Thijs B. A triangular model for publication and citation statistics  
619 of individual authors. *Scientometrics*. 2016;107(2):857-72. doi: 10.1007/s11192-016-1870-0.
- 620 83. Albert PJ, Dutta S, Lin J, Zhu ZM, Bales M, Johnson SB, et al. ReCiter: An open source,  
621 identity-driven, authorship prediction algorithm optimized for academic institutions. *Plos One*.  
622 2021;16(4). doi: 10.1371/journal.pone.0244641. PubMed PMID: WOS:000636467000022.
- 623 84. Wislar JS, Flanagan A, Fontanarosa PB, Deangelis CD. Honorary and ghost authorship in  
624 high impact biomedical journals: a cross sectional survey. *BMJ (Clinical research ed)*.  
625 2011;343:d6128. Epub 2011/10/27. doi: 10.1136/bmj.d6128. PubMed PMID: 22028479;  
626 PubMed Central PMCID: PMC3202014.
- 627 85. Al-Herz W, Haider H, Al-Bahhar M, Sadeq A. Honorary authorship in biomedical  
628 journals: how common is it and why does it exist? *Journal of medical ethics*. 2014;40(5):346-8.  
629 Epub 2013/08/21. doi: 10.1136/medethics-2012-101311. PubMed PMID: 23955369.

630 86. Abdill RJ, Blekhman R. Tracking the popularity and outcomes of all bioRxiv preprints.

631 eLife. 2019;8. doi: 10.7554/eLife.45133. PubMed PMID: WOS:000467693500001.

632 87. Sick N, Merig JM, Kratzig O, List J. Forty years of World Patent Information: A

633 bibliometric overview. World Patent Information. 2021;64. doi: 10.1016/j.wpi.2020.102011.

634 PubMed PMID: WOS:000636276000004.

635

## 636 **Supporting information**

637 **S1 File. TTA-derived results for the Clock field.** Csv file summarizing TTA data for the Clock

638 field using PubMed articles related to "circadian clock".
